# Supplementary material for: Phenotypic and Genotypic Antimicrobial Resistance Traits of Vibrio cholerae Non-O1/Non-O139 Isolated From a Large Austrian Lake Frequently Associated With Cases of Human Infection
Source: Front Microbiol. 2019 Nov 8;10:2600. doi: 10.3389/fmicb.2019.02600 (PMC6857200; doi:10.3389/fmicb.2019.02600)
Supplement: Supplementary file 4 [file Table_4.xlsx]

## Sheet: Table S4
	Lepuschitz S, Baron S, Larvor E, Granier SA, Pretzer C, Mach RL, Farnleitner AH, Ruppitsch W, Pleininger S, Indra A, Kirschner AKT: Phenotypic and genotypic antimicrobial resistance traits of Vibrio cholerae non-O1/non-O139 isolated from a large Austrian lake frequently associated with cases of human infection
	Table S4: Details on phenotypic and genotypic characterization of antbiotic resistance properties of 82 environmental and 9 clinical Vibrio cholerae strains.
	Table S4			phenotypic characterization																																	Table S4			genotypic characterization
				zone of inhibition (mm)																interpretation																				inactivation enzymes				integrons				efflux pumps and regulators
	Source		Strain-ID	chloramphenicol	trimethoprim-sulfamethoxazole	cefotaxime	amoxicillin-clavulanic acid	ciprofloxacin	streptomycin	impenem	ampicillin	nalidixic acid	tetracycline	amikacin	norfloxacin	sulfonamide	trimethoprim	gentamicin	erythromycin	chloramphenicol	trimethoprim-sulfamethoxazole	cefotaxime	amoxicillin-clavulanic acid	ciprofloxacin	streptomycin	impenem	ampicillin	nalidixic acid	tetracycline	amikacin	norfloxacin	sulfonamide	trimethoprim	gentamicin	erythromycin	antimicrobial profile	Source		Strain-ID	tet(34)	catB9	CARB-7 (beta-lactamase)	CARB-9 (beta-lactamase)	SXT element integrase gene (int)	SXT element AB resistance genes (sul2, dfrA, strB, tetA, floR)	class I integrase gene (intI1)	qnrVC1 (confers resistance to fluoroquinolones)	bicyclomycin/multidrug efflux system (in N16961/VC1634)	VcmA (MATE multidrug efflux pump from non O1 Vc NCTC4716)
	environmental	A36 water	A110509W1	30	27	36	21	33	15	26	23	31	30	20	32	6	27	20	20	S	S	S	S	S	S	S	S	S	S	S	S	R	S	S	-	SUL	environmental	A36 water	A110509W1	+	-	-	-	-	-	-	-	+	-
		A36 water	A110509W3	29	26	35	22	33	15	25	24	31	27	21	31	6	24	22	20	S	S	S	S	S	S	S	S	S	S	S	S	R	S	S	-	SUL		A36 water	A110509W3
		A36 water	A110523W4	30	28	36	20	35	15	25	6	33	29	20	33	18	25	20	17	S	S	S	S	S	S	S	R	S	S	S	S	S	S	S	-	AMP		A36 water	A110523W4
		A36 zooplankton	A110523Z4	28	25	34	20	35	15	24	23	31	29	19	32	6	25	20	20	S	S	S	S	S	S	S	S	S	S	S	S	R	S	S	-	SUL		A36 zooplankton	A110523Z4	+	+	-	-	-	-	-	-	+	+
		A36 water	A110621W3	31	30	37	21	37	15	26	24	34	30	22	35	6	28	23	21	S	S	S	S	S	S	S	S	S	S	S	S	R	S	S	-	SUL		A36 water	A110621W3	+	-	-	-	-	-	-	-	+	+
		A36 zooplankton	A110621Z1	28	25	32	19	34	14	22	20	32	26	20	33	6	23	19	16	S	S	S	S	S	I	S	S	S	S	S	S	R	S	S	-	STR SUL		A36 zooplankton	A110621Z1
		A36 water	A110704W3	27	24	32	19	35	15	25	6	31	27	21	32	6	23	21	18	S	S	S	S	S	S	S	R	S	S	S	S	R	S	S	-	AMP SUL		A36 water	A110704W3
		A36 water	A110704W4	27	26	35	20	34	16	25	22	32	25	21	33	6	25	22	20	S	S	S	S	S	S	S	S	S	S	S	S	R	S	S	-	SUL		A36 water	A110704W4	+	-	-	-	-	-	-	-	+	-
		A36 water	A110704W5	29	26	35	22	35	15	25	24	32	28	21	32	6	25	21	18	S	S	S	S	S	S	S	S	S	S	S	S	R	S	S	-	SUL		A36 water	A110704W5
		A36 water	A110718W2	30	29	37	21	37	15	25	24	31	28	22	34	6	29	23	19	S	S	S	S	S	S	S	S	S	S	S	S	R	S	S	-	SUL		A36 water	A110718W2
		A36 water	A110801W3	30	28	37	24	38	13	26	24	32	31	21	37	6	26	22	23	S	S	S	S	S	I	S	S	S	S	S	S	R	S	S	-	STR SUL		A36 water	A110801W3
		A36 zooplankton	A110801Z2	28	28	35	21	35	15	25	23	32	27	21	32	6	25	20	18	S	S	S	S	S	S	S	S	S	S	S	S	R	S	S	-	SUL		A36 zooplankton	A110801Z2
		A36 water	A110829W1	31	27	36	21	37	15	27	24	34	31	21	34	6	25	23	20	S	S	S	S	S	S	S	S	S	S	S	S	R	S	S	-	SUL		A36 water	A110829W1
		A36 water	A110829W4	32	31	38	20	36	14	26	6	33	29	21	35	8	28	22	21	S	S	S	S	S	I	S	R	S	S	S	S	R	S	S	-	STR AMP SUL		A36 water	A110829W4
		A36 zooplankton	A110829Z2	30	27	36	23	34	15	25	24	32	28	21	32	6	24	21	19	S	S	S	S	S	S	S	S	S	S	S	S	R	S	S	-	SUL		A36 zooplankton	A110829Z2
		A36 zooplankton	A110829Z3	27	27	36	21	35	15	27	6	32	29	20	33	6	27	22	20	S	S	S	S	S	S	S	R	S	S	S	S	R	S	S	-	AMP SUL		A36 zooplankton	A110829Z3
		A36 zooplankton	A110829Z5	30	26	35	21	35	14	25	23	33	30	21	34	6	23	21	19	S	S	S	S	S	I	S	S	S	S	S	S	R	S	S	-	STR SUL		A36 zooplankton	A110829Z5	+	-	-	-	-	-	-	-	+	-
		A36 zooplankton	A110829Z6	31	28	37	24	35	15	28	29	33	30	21	34	7	25	21	20	S	S	S	S	S	S	S	S	S	S	S	S	R	S	S	-	SUL		A36 zooplankton	A110829Z6	+	-	-	-	-	-	-	-	+	+
		A36 zooplankton	A110912Z1	27	24	33	21	35	12	26	23	32	25	21	33	6	23	20	20	S	S	S	S	S	I	S	S	S	S	S	S	R	S	S	-	STR SUL		A36 zooplankton	A110912Z1	+	-	-	-	-	-	-	-	+	-
		A36 zooplankton	A110912Z3	33	33	40	29	39	18	32	31	36	33	24	37	8	31	24	22	S	S	S	S	S	S	S	S	S	S	S	S	R	S	S	-	SUL		A36 zooplankton	A110912Z3	+	-	-	-	-	-	-	-	+	+
		A36 water	A110926W4	27	24	34	19	31	15	25	6	30	27	20	31	6	22	21	19	S	S	S	S	S	S	S	R	S	S	S	S	R	S	S	-	AMP SUL		A36 water	A110926W4	+	-	+	-	-	-	-	-	+	+
		A36 water	A111010W3	31	27	37	22	36	17	28	25	33	27	23	35	6	25	24	21	S	S	S	S	S	S	S	S	S	S	S	S	R	S	S	-	SUL		A36 water	A111010W3
		A36 zooplankton	A111010Z3	28	24	31	20	32	12	24	22	29	27	18	31	6	23	18	17	S	S	S	S	S	I	S	S	S	S	S	S	R	S	S	-	STR SUL		A36 zooplankton	A111010Z3	+	-	-	-	-	-	-	-	+	+
		A36 water	A120416W2	34	29	39	21	40	16	26	24	36	31	21	39	6	26	23	23	S	S	S	S	S	S	S	S	S	S	S	S	R	S	S	-	SUL		A36 water	A120416W2	+	-	-	-	-	-	-	-	+	+
		A36 water	A120502W2	30	28	38	21	37	15	26	24	34	28	22	35	6	26	21	21	S	S	S	S	S	S	S	S	S	S	S	S	R	S	S	-	SUL		A36 water	A120502W2	+	-	-	-	-	-	-	-	+	-
		A36 water	A120502W3	29	28	39	21	39	15	26	24	35	27	22	37	14	26	22	20	S	S	S	S	S	S	S	S	S	S	S	S	I	S	S	-	SUL		A36 water	A120502W3
		A36 zooplankton	A120502Z1	28	27	37	22	37	12	27	23	32	28	20	34	6	23	20	20	S	S	S	S	S	I	S	S	S	S	S	S	R	S	S	-	STR SUL		A36 zooplankton	A120502Z1	+	-	-	-	-	-	-	-	+	+
		A36 zooplankton	A120502Z2	28	26	37	20	35	15	25	10	32	29	22	34	6	24	22	21	S	S	S	S	S	S	S	R	S	S	S	S	R	S	S	-	AMP SUL		A36 zooplankton	A120502Z2
		A36 zooplankton	A120502Z5	27	24	34	20	34	13	25	22	32	26	21	32	6	23	21	19	S	S	S	S	S	I	S	S	S	S	S	S	R	S	S	-	STR SUL		A36 zooplankton	A120502Z5	+	-	-	-	-	-	-	-	+	-
		A36 zooplankton	A120618Z1	29	26	35	21	34	15	25	23	33	30	20	34	6	23	21	20	S	S	S	S	S	S	S	S	S	S	S	S	R	S	S	-	SUL		A36 zooplankton	A120618Z1	+	-	-	-	-	-	-	-	+	+
		A36 water	A120702W1	29	27	35	23	36	16	27	24	31	29	22	35	6	25	23	19	S	S	S	S	S	S	S	S	S	S	S	S	R	S	S	-	SUL		A36 water	A120702W1
		A36 water	A120702W2	29	27	37	22	38	12	28	24	33	27	22	35	6	25	21	18	S	S	S	S	S	I	S	S	S	S	S	S	R	S	S	-	STR SUL		A36 water	A120702W2
		A36 zooplankton	A120716Z1	29	27	36	22	36	14	27	24	33	29	22	34	6	28	23	22	S	S	S	S	S	I	S	S	S	S	S	S	R	S	S	-	STR SUL		A36 zooplankton	A120716Z1
		A36 zooplankton	A120716Z2	28	24	32	20	34	15	24	22	31	29	21	33	6	22	21	21	S	S	S	S	S	S	S	S	S	S	S	S	R	S	S	-	SUL		A36 zooplankton	A120716Z2
		A36 zooplankton	A120716Z3	31	24	35	20	34	16	25	22	31	29	21	32	6	23	20	19	S	S	S	S	S	S	S	S	S	S	S	S	R	S	S	-	SUL		A36 zooplankton	A120716Z3	+	-	-	-	-	-	-	-	+	+
		A36 zooplankton	A120716Z4	28	25	33	20	33	15	24	22	30	28	20	32	6	24	21	19	S	S	S	S	S	S	S	S	S	S	S	S	R	S	S	-	SUL		A36 zooplankton	A120716Z4
		A36 zooplankton	A120730Z1	29	26	34	19	34	15	25	6	32	27	20	33	6	27	21	18	S	S	S	S	S	S	S	R	S	S	S	S	R	S	S	-	AMP SUL		A36 zooplankton	A120730Z1	+	-	+	-	-	-	-	-	+	-
		A36 zooplankton	A120730Z3	28	25	34	20	34	14	24	23	32	29	20	31	6	23	21	18	S	S	S	S	S	I	S	S	S	S	S	S	R	S	S	-	STR SUL		A36 zooplankton	A120730Z3
		A36 zooplankton	A120730Z5	34	29	38	22	37	15	26	25	35	27	22	37	22	26	22	23	S	S	S	S	S	S	S	S	S	S	S	S	S	S	S	-	MS		A36 zooplankton	A120730Z5
		A36 water	A120828W5	30	26	35	21	35	16	25	23	31	27	21	32	6	23	21	20	S	S	S	S	S	S	S	S	S	S	S	S	R	S	S	-	SUL		A36 water	A120828W5
		A36 water	A120910W1	32	27	36	21	33	13	25	22	31	29	20	32	6	24	21	18	S	S	S	S	S	I	S	S	S	S	S	S	R	S	S	-	STR SUL		A36 water	A120910W1
		A36 water	A121001W1	28	26	33	21	35	13	26	23	33	27	19	33	6	25	19	18	S	S	S	S	S	I	S	S	S	S	S	S	R	S	S	-	STR SUL		A36 water	A121001W1	+	-	-	-	-	-	-	-	+	-
		A36 water	A121001W2	29	25	35	21	36	14	25	23	32	28	21	34	6	24	22	20	S	S	S	S	S	I	S	S	S	S	S	S	R	S	S	-	STR SUL		A36 water	A121001W2	+	-	-	-	-	-	-	-	+	+
		A36 water	A121001W4	30	26	37	21	35	16	26	23	32	30	22	33	6	24	22	19	S	S	S	S	S	S	S	S	S	S	S	S	R	S	S	-	SUL		A36 water	A121001W4
		A4 water	A12JL4W4	28	25	32	20	35	14	26	22	34	26	21	35	6	25	19	16	S	S	S	S	S	I	S	S	S	S	S	S	R	S	S	-	STR SUL		A4 water	A12JL4W4	+	-	-	-	-	-	-	-	+	+
		A4 water	A12JL4W15	29	27	36	20	35	13	26	6	32	28	21	33	6	25	21	18	S	S	S	S	S	I	S	R	S	S	S	S	R	S	S	-	STR AMP SUL		A4 water	A12JL4W15	+	-	+	-	-	-	-	-	+	+
		A4 water	A12JL4W21	29	26	35	19	34	15	25	6	32	27	21	33	6	27	21	18	S	S	S	S	S	S	S	R	S	S	S	S	R	S	S	-	AMP SUL		A4 water	A12JL4W21	+	-	+	-	-	-	-	-	+	-
		A4 water	A12JL4W64	28	25	35	20	30	13	23	22	28	26	20	30	6	24	20	20	S	S	S	S	S	I	S	S	S	S	S	S	R	S	S	-	STR SUL		A4 water	A12JL4W64	+	-	-	-	-	-	-	-	+	+
		A4 water	A12JL4W72	27	24	35	20	34	14	25	22	32	25	20	34	6	19	20	18	S	S	S	S	S	I	S	S	S	S	S	S	R	S	S	-	STR SUL		A4 water	A12JL4W72	+	-	-	-	-	-	-	-	+	+
		A4 water	A12JL4W81	29	28	38	22	36	14	27	24	33	29	22	34	6	25	22	22	S	S	S	S	S	I	S	S	S	S	S	S	R	S	S	-	STR SUL		A4 water	A12JL4W81	+	+	-	-	-	-	-	-	+	+
		A4 water	A12JL4W93	27	24	35	21	34	14	26	23	32	26	20	32	6	23	20	19	S	S	S	S	S	I	S	S	S	S	S	S	R	S	S	-	STR SUL		A4 water	A12JL4W93	+	-	-	-	-	-	-	-	+	+
		A5 water	A12JL5W1	28	25	35	20	33	12	25	6	33	28	20	33	6	23	19	18	S	S	S	S	S	I	S	R	S	S	S	S	R	S	S	-	STR AMP SUL		A5 water	A12JL5W1
		A5 water	A12JL5W5	27	25	35	20	33	12	25	6	31	26	21	33	6	23	21	19	S	S	S	S	S	I	S	R	S	S	S	S	R	S	S	-	STR AMP SUL		A5 water	A12JL5W5
		A5 water	A12JL5W13	29	25	36	21	35	15	25	24	33	29	21	33	6	23	22	21	S	S	S	S	S	S	S	S	S	S	S	S	R	S	S	-	SUL		A5 water	A12JL5W13	+	-	-	-	-	-	-	-	+	-
		A5 water	A12JL5W14	31	27	38	24	38	15	28	25	33	31	24	35	6	27	24	21	S	S	S	S	S	S	S	S	S	S	S	S	R	S	S	-	SUL		A5 water	A12JL5W14	+	-	-	-	-	-	-	-	+	-
		A5 water	A12JL5W24	30	28	34	20	36	14	25	6	32	28	20	34	14	26	21	21	S	S	S	S	S	I	S	R	S	S	S	S	I	S	S	-	STR AMP SUL		A5 water	A12JL5W24	+	-	+	-	-	-	-	-	+	-
		A5 water	A12JL5W63	28	26	34	24	35	14	27	24	34	29	22	34	6	26	22	18	S	S	S	S	S	I	S	S	S	S	S	S	R	S	S	-	STR SUL		A5 water	A12JL5W63	+	-	-	-	-	-	-	-	+	-
		A5 water	A12JL5W86	28	26	33	21	33	12	24	22	30	26	20	31	6	26	20	18	S	S	S	S	S	I	S	S	S	S	S	S	R	S	S	-	STR SUL		A5 water	A12JL5W86	+	+	-	-	-	-	-	-	+	+
		A5 water	A12JL5W90	29	26	34	20	36	16	26	6	33	30	22	34	8	25	21	19	S	S	S	S	S	S	S	R	S	S	S	S	R	S	S	-	AMP SUL		A5 water	A12JL5W90	+	-	+	-	-	-	-	-	+	+
		A5 water	A12JL5W95	29	26	34	21	33	15	25	6	31	28	20	31	6	26	20	18	S	S	S	S	S	S	S	R	S	S	S	S	R	S	S	-	AMP SUL		A5 water	A12JL5W95
		A5 water	A12JL5W97	30	25	34	20	35	15	24	23	32	27	20	34	6	23	21	19	S	S	S	S	S	S	S	S	S	S	S	S	R	S	S	-	SUL		A5 water	A12JL5W97	+	-	-	-	-	-	-	-	+	+
		A5 water	A12JL5W100	27	24	34	19	32	12	25	8	31	27	20	32	6	23	21	19	S	S	S	S	S	I	S	R	S	S	S	S	R	S	S	-	STR AMP SUL		A5 water	A12JL5W100
		A36 water	A12JL36W5	29	26	34	21	33	15	25	23	31	28	21	31	6	23	21	19	S	S	S	S	S	S	S	S	S	S	S	S	R	S	S	-	SUL		A36 water	A12JL36W5	+	-	-	-	-	-	-	-	+	+
		A36 water	A12JL36W17	29	30	38	22	35	15	27	24	32	31	22	33	7	28	23	18	S	S	S	S	S	S	S	S	S	S	S	S	R	S	S	-	SUL		A36 water	A12JL36W17	+	-	-	-	-	-	-	-	+	+
		A36 water	A12JL36W21	27	24	35	20	35	16	25	22	31	28	20	31	13	22	20	19	S	S	S	S	S	S	S	S	S	S	S	S	I	S	S	-	SUL		A36 water	A12JL36W21
		A36 water	A12JL36W25	29	27	35	22	34	16	26	24	31	29	22	33	6	26	23	20	S	S	S	S	S	S	S	S	S	S	S	S	R	S	S	-	SUL		A36 water	A12JL36W25	+	-	-	-	-	-	-	-	+	-
		A36 water	A12JL36W30	27	25	34	19	35	14	25	6	32	27	20	34	6	23	20	17	S	S	S	S	S	I	S	R	S	S	S	S	R	S	S	-	STR AMP SUL		A36 water	A12JL36W30	+	+	+	-	-	-	-	-	+	+
		A36 water	A12JL36W32	29	25	34	22	36	15	26	24	32	27	21	34	6	24	22	19	S	S	S	S	S	S	S	S	S	S	S	S	R	S	S	-	SUL		A36 water	A12JL36W32
		A36 water	A12JL36W38	28	26	34	20	36	15	24	22	33	27	20	33	12	26	20	20	S	S	S	S	S	S	S	S	S	S	S	S	R	S	S	-	SUL		A36 water	A12JL36W38
		A36 water	A12JL36W49	26	25	34	18	33	15	25	6	31	29	20	31	6	24	19	19	S	S	S	S	S	S	S	R	S	S	S	S	R	S	S	-	AMP SUL		A36 water	A12JL36W49	+	-	-	+	-	-	-	-	+	-
		A36 water	A12JL36W52	28	26	35	21	34	13	24	22	31	29	20	33	6	24	21	19	S	S	S	S	S	I	S	S	S	S	S	S	R	S	S	-	STR SUL		A36 water	A12JL36W52	+	+	-	-	-	-	-	-	+	+
		A36 water	A12JL36W56	29	27	38	19	36	17	25	6	32	30	23	34	6	25	22	20	S	S	S	S	S	S	S	R	S	S	S	S	R	S	S	-	AMP SUL		A36 water	A12JL36W56
		A36 water	A12JL36W59	28	24	35	20	35	16	25	6	31	27	21	32	6	22	21	19	S	S	S	S	S	S	S	R	S	S	S	S	R	S	S	-	AMP SUL		A36 water	A12JL36W59
		A36 water	A12JL36W63	30	28	36	21	36	15	26	23	32	29	21	34	6	29	22	20	S	S	S	S	S	S	S	S	S	S	S	S	R	S	S	-	SUL		A36 water	A12JL36W63
		A36 water	A12JL36W67	31	28	37	21	35	15	26	6	33	30	20	34	14	25	20	18	S	S	S	S	S	S	S	R	S	S	S	S	I	S	S	-	AMP SUL		A36 water	A12JL36W67	+	-	-	+	-	-	-	-	+	-
		A36 water	A12JL36W74	28	24	37	23	33	14	26	26	30	28	20	31	6	22	20	22	S	S	S	S	S	I	S	S	S	S	S	S	R	S	S	-	STR SUL		A36 water	A12JL36W74	+	-	-	-	-	-	-	-	+	+
		A36 water	A12JL36W75	27	26	35	21	34	13	26	23	32	25	20	32	6	26	20	20	S	S	S	S	S	I	S	S	S	S	S	S	R	S	S	-	STR SUL		A36 water	A12JL36W75	+	+	-	-	-	-	-	-	+	+
		A36 water	A12JL36W81	29	26	36	20	34	16	26	23	32	29	22	34	6	25	22	19	S	S	S	S	S	S	S	S	S	S	S	S	R	S	S	-	SUL		A36 water	A12JL36W81
		A36 water	A12JL36W82	29	26	35	20	35	13	25	22	32	30	21	33	6	23	21	18	S	S	S	S	S	I	S	S	S	S	S	S	R	S	S	-	STR SUL		A36 water	A12JL36W82	+	-	-	-	-	-	-	-	+	-
		A36 water	A12JL36W90	30	27	37	20	35	16	26	23	33	30	21	31	6	27	22	20	S	S	S	S	S	S	S	S	S	S	S	S	R	S	S	-	SUL		A36 water	A12JL36W90	+	-	-	-	-	-	-	-	+	+
		A36 water	A12JL36W91	31	26	36	21	34	15	26	23	33	32	21	33	6	24	22	22	S	S	S	S	S	S	S	S	S	S	S	S	R	S	S	-	SUL		A36 water	A12JL36W91	+	-	-	-	-	-	-	-	+	+
		A36 water	A12JL36W92	32	25	37	24	33	14	26	26	32	29	22	31	6	23	22	19	S	S	S	S	S	I	S	S	S	S	S	S	R	S	S	-	STR SUL		A36 water	A12JL36W92	+	-	-	-	-	-	-	-	+	+
	patient	patient	CHT 85-09 (VC83)	28	26	36	22	37	16	27	25	33	29	23	35	6	26	23	24	S	S	S	S	S	S	S	S	S	S	S	S	R	S	S	-	SUL	patient	patient	CHT 85-09 (VC83)
		patient	P2-CHT15-00	26	23	30	19	32	12	24	6	36	24	18	34	15	20	16	15	S	S	S	S	S	I	S	R	S	S	S	S	I	S	S	-	AMP STR SUL		patient	P2-CHT15-00	+	+	+	-	-	-	-	-	+	+
		patient	P7-CHT61-04	28	24	30	18	30	8	21	19	35	25	19	35	15	20	20	20	S	S	S	S	S	R	S	S	S	S	S	S	I	S	S	-	STR SUL		patient	P7-CHT61-04	+	+	-	-	-	-	-	-	+	+
		patient	P9-CHT63-05	28	26	30	20	32	8	22	20	36	26	20	35	30	22	20	16	S	S	S	S	S	R	S	S	S	S	S	S	S	S	S	-	STR		patient	P9-CHT63-05	+	-	-	-	-	-	-	-	+	failed QC
		patient	P10-CHT64-05	25	22	32	16	36	8	16	6	35	22	22	33	16	20	18	19	S	S	S	I	S	R	S	R	S	S	S	S	I	S	S	-	AMO/CLA STR AMP SUL		patient	P10-CHT64-05	+	+	+	-	-	-	-	-	+	+
		patient	P12-CHT68-05	26	21	31	16	28	9	21	6	36	25	19	34	11	20	19	15	S	S	S	I	S	R	S	R	S	S	S	S	I	S	S	-	AMO/CLA STR AMP SUL		patient	P12-CHT68-05	+	-	+	-	-	-	-	-	+	+
		patient	P19-CHT78-07	27	25	30	18	32	14	22	20	36	26	21	34	19	21	20	14	S	S	S	S	S	I	S	S	S	S	S	S	S	S	S	-	STR		patient	P19-CHT78-07	+	-	-	-	-	-	-	-	+	failed QC
		patient	920006-15	25	20	30	17	28	9	20	17	35	25	17	35	21	20	17	16	S	S	S	I	S	R	S	S	S	S	S	S	S	S	S	-	AMO/CLA STR		patient	920006-15	+	-	-	-	-	-	-	-	+	+
		patient	920008-15	27	23	31	18	26	7	20	17	35	25	17	34	16	22	16	16	S	S	S	S	S	R	S	S	S	S	S	S	I	S	S	-	STR SUL		patient	920008-15	+	-	-	-	-	-	-	-	+	+
[truncated: 6 more columns]
